# Supplementary material for: Effect of Feed Texture and Dimensions, on Feed Waste Type and Feeding Efficiency in Juvenile Sagmariasus verreauxi
Source: MDPI journal article supplement (doi:10.3390/fishes8110553), 2023-11-16
Supplement: s1 [file s1]

Supplementary materials

**Table S1.** Expt. 1 feeding randomisation for fourteen consecutive days; experimental feeds included seven diameters (Ø) HDP (hard dry pellet) and seven diameters (Ø) SMP (soft moist pellet).

| Feed type | Feed Ø<br>(mm) | Feeding day number |        |        |        |        |        |        |        |
|-----------|----------------|--------------------|--------|--------|--------|--------|--------|--------|--------|
|           |                | Tank 1             | Tank 2 | Tank 3 | Tank 4 | Tank 5 | Tank 6 | Tank 7 | Tank 8 |
| HDP       | 1.3            | 13                 | 14     | 7      | 7      | 5      | 10     | 10     | 4      |
| HDP       | 2.3            | 10                 | 10     | 6      | 9      | 7      | 9      | 2      | 6      |
| HDP       | 3.3            | 5                  | 8      | 1      | 1      | 13     | 6      | 4      | 9      |
| HDP       | 4.3            | 2                  | 6      | 10     | 11     | 3      | 1      | 14     | 7      |
| HDP       | 5.8            | 3                  | 3      | 8      | 3      | 8      | 5      | 1      | 13     |
| HDP       | 7.8            | 14                 | 12     | 13     | 13     | 2      | 12     | 12     | 2      |
| HDP       | 9.5            | 7                  | 9      | 5      | 10     | 14     | 4      | 8      | 3      |
| SMP       | 1.5            | 9                  | 7      | 9      | 5      | 12     | 7      | 6      | 8      |
| SMP       | 2.8            | 8                  | 5      | 11     | 8      | 11     | 13     | 11     | 12     |
| SMP       | 3.7            | 4                  | 13     | 4      | 12     | 10     | 8      | 13     | 1      |
| SMP       | 5.0            | 12                 | 11     | 12     | 6      | 6      | 3      | 3      | 11     |
| SMP       | 7.0            | 6                  | 4      | 2      | 4      | 9      | 2      | 9      | 5      |
| SMP       | 8.7            | 1                  | 2      | 14     | 14     | 4      | 14     | 5      | 14     |
| SMP       | 10.2           | 11                 | 1      | 3      | 2      | 1      | 11     | 7      | 10     |

**Table S2.** Expt. 2 feeding randomisation for seven consecutive days; experimental feeds included seven lengths HDP (hard dry pellet).

| Feed type | Feed length<br>(mm) | Feeding day number |        |        |        |        |        |        |        |
|-----------|---------------------|--------------------|--------|--------|--------|--------|--------|--------|--------|
|           |                     | Tank 1             | Tank 2 | Tank 3 | Tank 4 | Tank 5 | Tank 6 | Tank 7 | Tank 8 |
| HDP       | 5                   | 6                  | 3      | 4      | 7      | 2      | 3      | 1      | 6      |
| HDP       | 8                   | 4                  | 4      | 6      | 2      | 3      | 2      | 3      | 7      |
| HDP       | 13                  | 2                  | 6      | 5      | 5      | 4      | 7      | 5      | 5      |
| HDP       | 21                  | 7                  | 7      | 7      | 1      | 6      | 5      | 6      | 1      |
| HDP       | 33                  | 1                  | 1      | 2      | 6      | 1      | 1      | 4      | 4      |
| HDP       | 53                  | 3                  | 2      | 3      | 3      | 5      | 4      | 7      | 2      |
| HDP       | 84                  | 5                  | 5      | 1      | 4      | 7      | 6      | 2      | 3      |
